# Supplementary material for: Phosphorus doped two-dimensional CoFe2O4 nanobelts decorated with Ru nanoclusters and Co–Fe hydroxide as efficient electrocatalysts toward hydrogen generation
Source: Royal Society of Chemistry journal article supplement (doi:10.1039/d2qi00086e), 2022-01-01
Supplement: d2qi00086e2.pdf [file d2qi00086e2.pdf]

## ***Supporting Information***

### **Phosphorous Doped Two-dimensional CoFe<sub>2</sub>O<sub>4</sub> Nanobelt Decorated with Ru Nanoclusters and Co-Fe Hydroxide as Efficient Electrocatalysts Toward Hydrogen Generation**

Wenli Yu<sup>1</sup>, Zhi Chen<sup>2</sup>, Weiping Xiao<sup>3</sup>, Yongming Chai<sup>1</sup>, Bin Dong<sup>\*,1</sup>, Zexing Wu<sup>\*,2,4</sup>,  
Lei Wang<sup>2</sup>

1. State Key Laboratory of Heavy Oil Processing, College of Science, China University of Petroleum (East China), Qingdao, 266580, P. R. China E-mail: dongbin@upc.edu.cn

2. Key Laboratory of Eco-chemical Engineering, Taishan Scholar Advantage and Characteristic Discipline Team of Eco Chemical Process and Technology, Ministry of Education, Laboratory of Inorganic Synthesis and Applied Chemistry, College of Chemistry and Molecular Engineering, Qingdao University of Science and Technology, Qingdao 266042, P. R. China E-mail: splswzx@qust.edu.cn,

3. College of Science, Nanjing Forestry University, Nanjing, 210037, PR China

4. Key Laboratory of Advanced Energy Materials Chemistry (Ministry of Education), College of Chemistry, Nankai University, Tianjin 300071, China

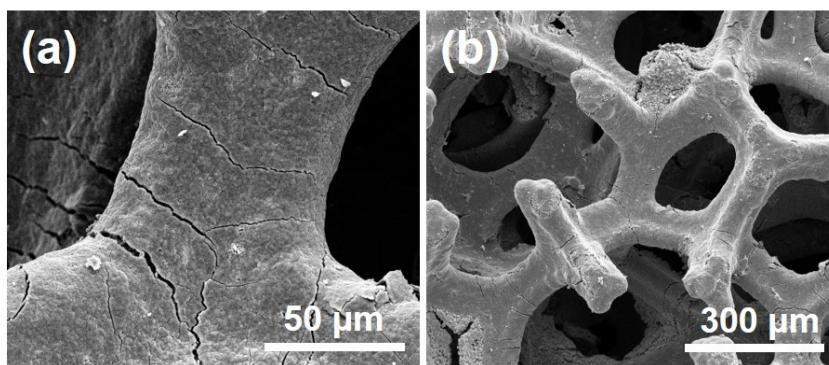

**Figure S1** SEM images of iron foam with different magnification.

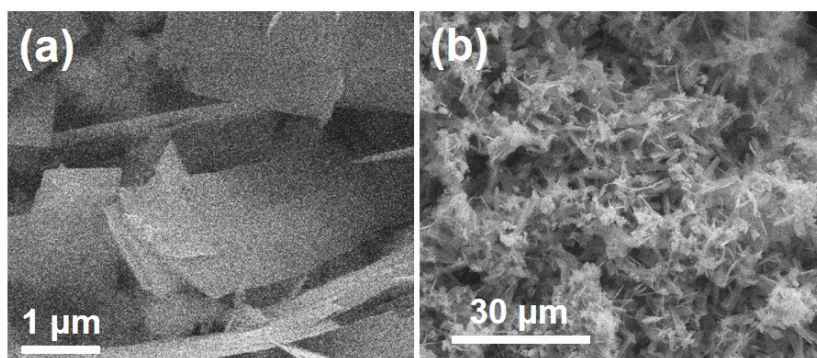

**Figure S2** SEM images of the product after the hydrothermal reaction with different magnification.

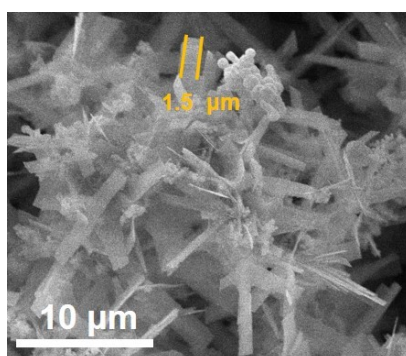

**Figure S3** SEM image of the product after the hydrothermal reaction.

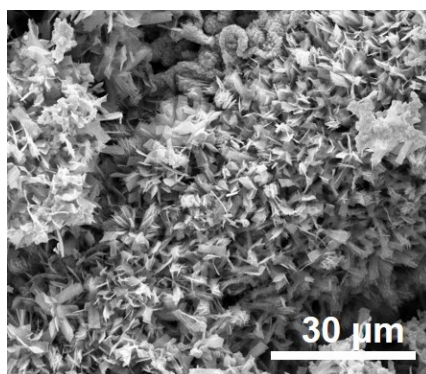

**Figure S4** SEM image of Ru/P-CoFe<sub>2</sub>O<sub>4</sub>/IF.

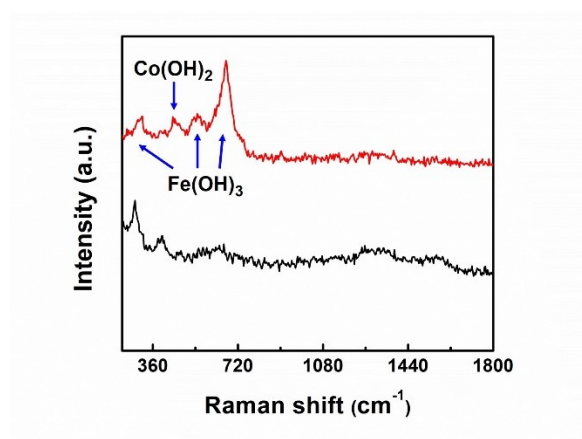

**Figure S5** Raman spectra of CoFeO<sub>x</sub>H<sub>y</sub>-Ru/P-CoFe<sub>2</sub>O<sub>4</sub>/IF (red line) and Ru/P-CoFe<sub>2</sub>O<sub>4</sub>/IF (black line).

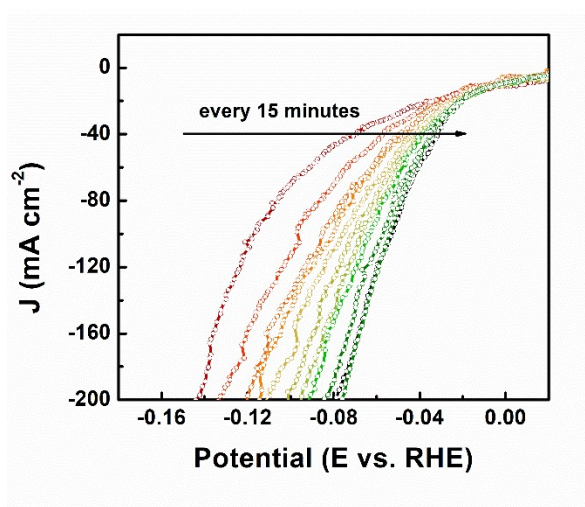

**Figure S6** HER polarization curves of as prepared catalyst tested every 15 minutes.

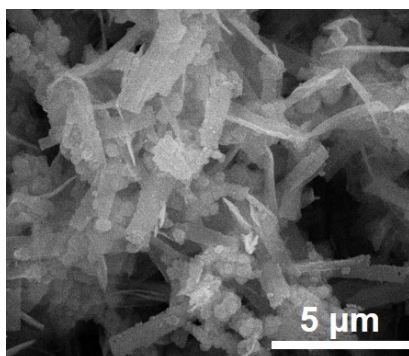

**Figure S7** SEM image of pre-catalyst after soaking in water.

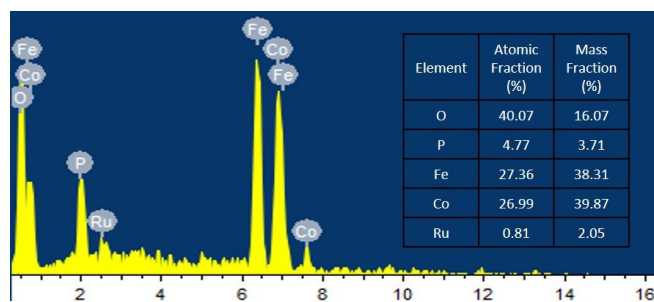

**Figure S8** the EDS mappings  $\text{CoFeO}_x\text{H}_y\text{-Ru/P-CoFe}_2\text{O}_4/\text{IF}$ .

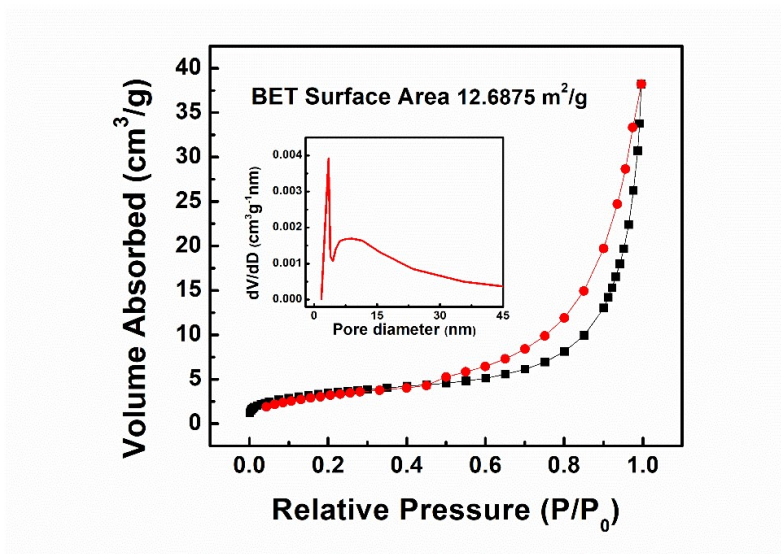

**Figure S9**  $N_2$  sorption isotherms and pore size distribution curve of  $CoFeO_xH_y$ -Ru/P- $CoFe_2O_4$ /IF.

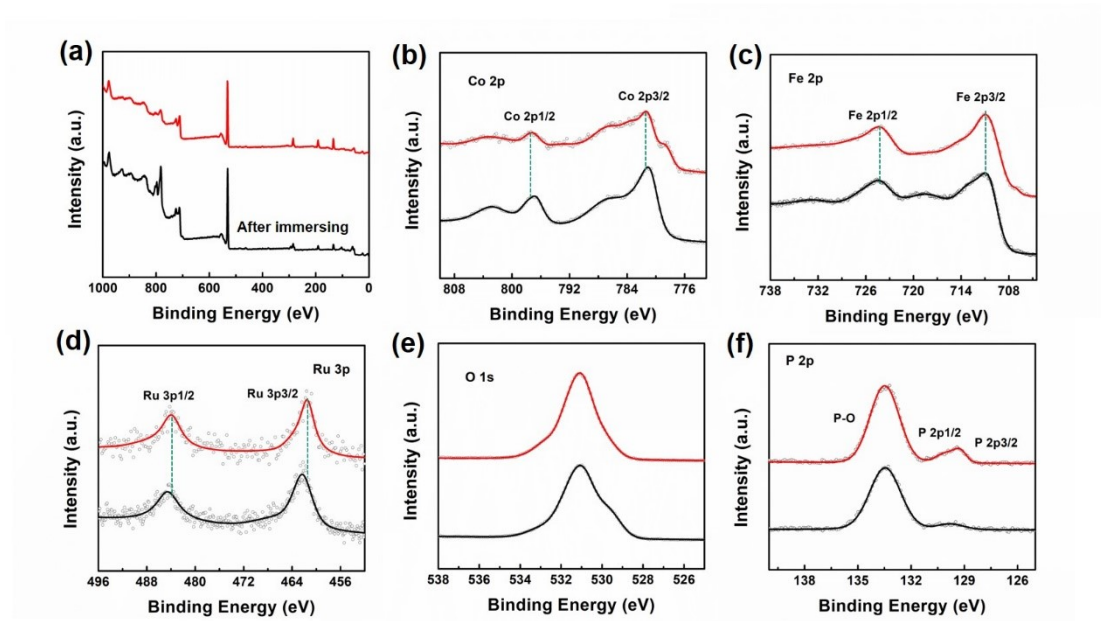

**Figure S10** XPS survey spectrum (a) high-resolution of Co 2p (b), Fe 2p (c), Ru 3p (d), O 1s (e) and P 2p (f) of the designed Ru/P- $CoFe_2O_4$ /IF (red line) and  $CoFeO_xH_y$ -Ru/P- $CoFe_2O_4$ /IF (black line).

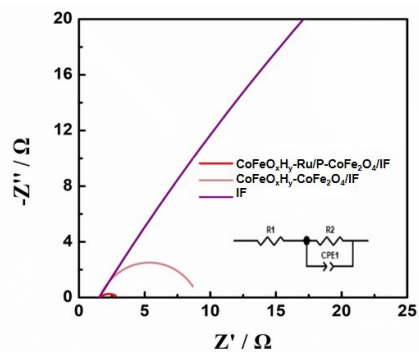

**Figure S11** Nyquist plots of obtained catalysts in 1M KOH.

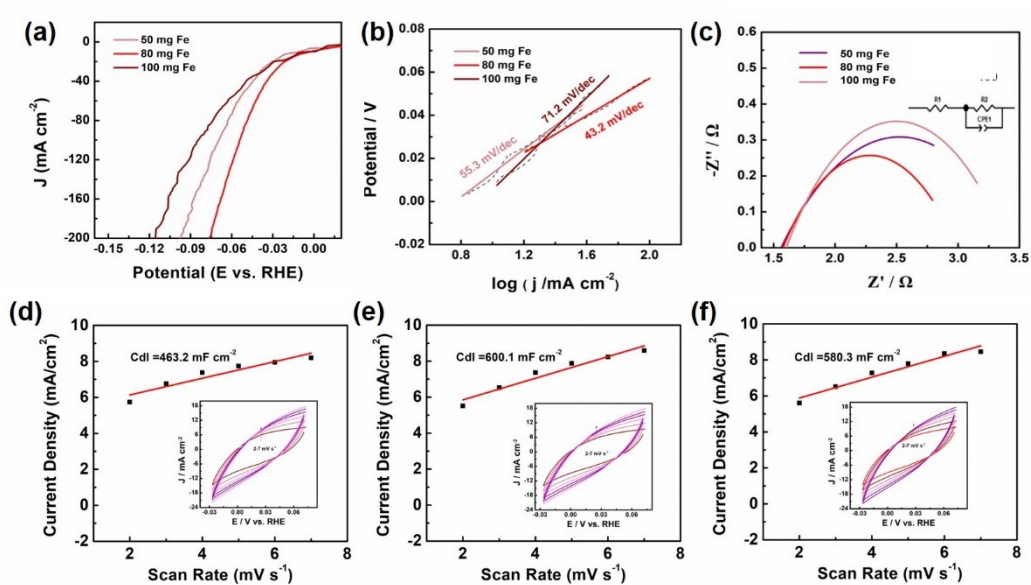

**Figure S12** Electrochemical measurements: (a) HER polarization curves, (b) Tafel slopes, (c) Nyquist plots, (d-f) linear fitting of scan rates with capacitive current densities (inset is CV curves under different scan rate) of obtained catalysts in 1M KOH.



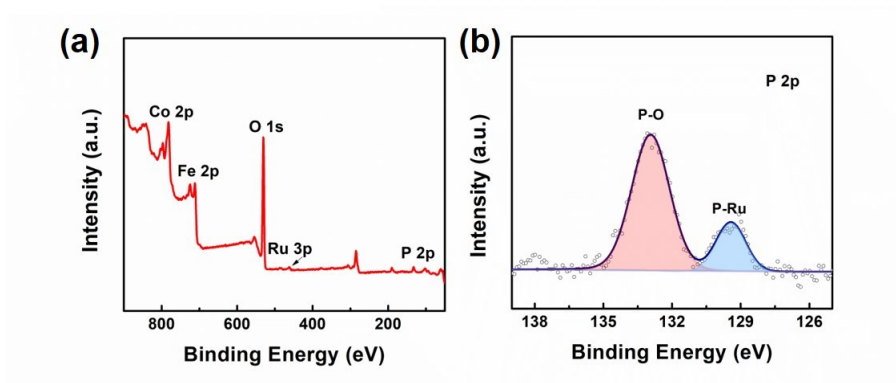

**Figure S13** XPS survey spectrum (a) and high-resolution of P 2p (b) of the designed  $\text{CoFeO}_x\text{H}_y\text{-Ru/P-CoFe}_2\text{O}_4/\text{IF}$  after long-time stability test.

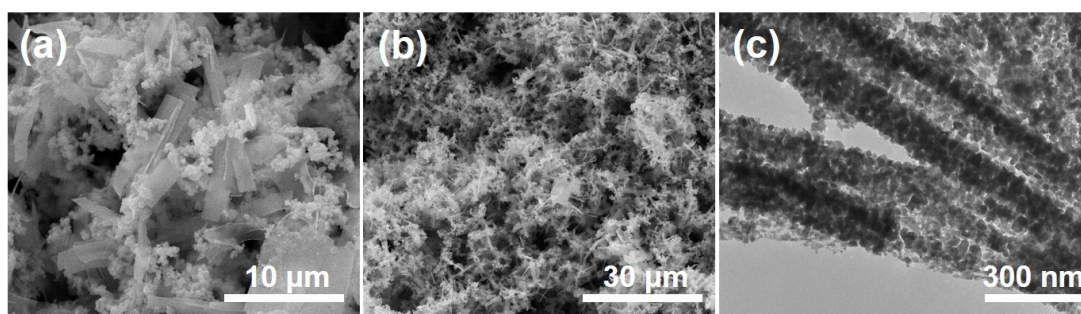

**Figure S14** (a, b) SEM image of  $\text{RuO}_2/\text{CoFe}_2\text{O}_4$  with different magnification. (c) TEM image of  $\text{RuO}_2/\text{CoFe}_2\text{O}_4$ .

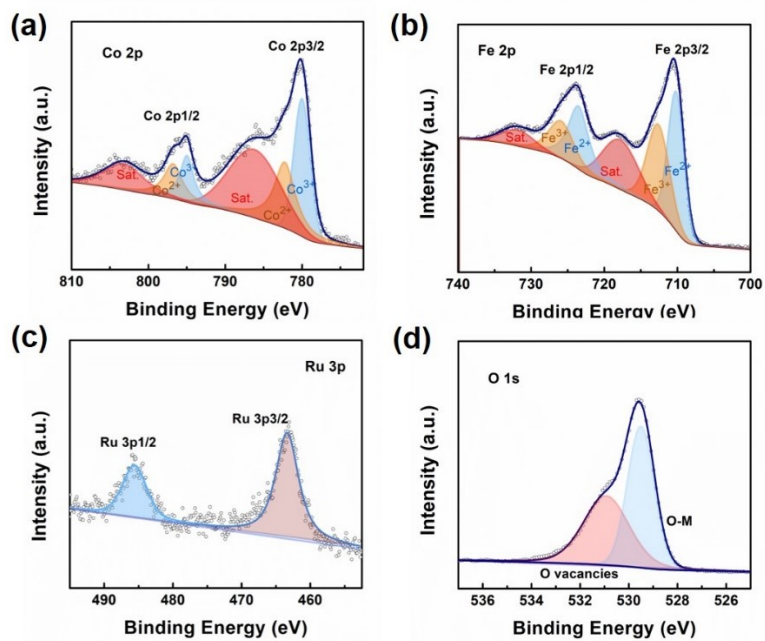

**Figure S15** XPS survey spectrum high-resolution of Co 2p (a), Fe 2p (b), Ru 3p (c) and O 1s (d) of the designed RuO<sub>2</sub>/CoFe<sub>2</sub>O<sub>4</sub>.

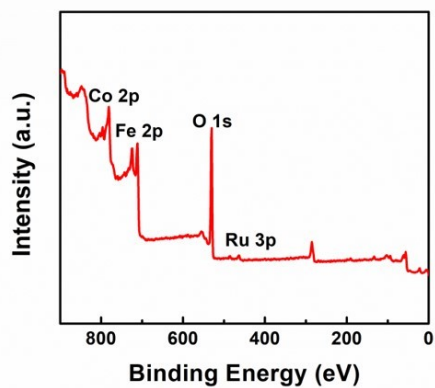

**Figure 16** XPS survey spectrum of the designed RuO<sub>2</sub>/CoFe<sub>2</sub>O<sub>4</sub>.



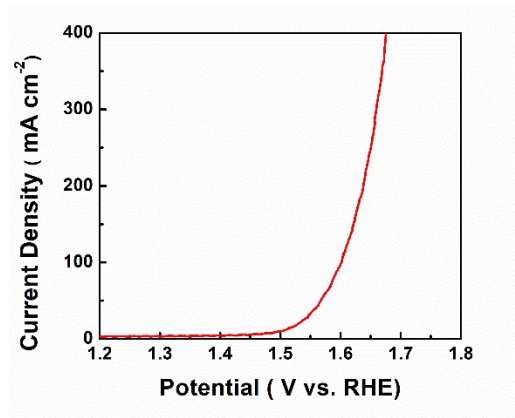

**Figure 17** LSV curve of the designed RuO<sub>2</sub>/CoFe<sub>2</sub>O<sub>4</sub>.

**Table S1** Element content of Fe, Co Ru and P in 1M KOH after the hydrolysis determined using ICP.

| State of solution | Element | the element content of the solution (mg/L) | Diluted multiples | Sample element content (mg/L) |
|-------------------|---------|--------------------------------------------|-------------------|-------------------------------|
| <b>initial</b>    | Fe      | < 0.02                                     | 10                | < 0.2                         |
| <b>final</b>      | Fe      | < 0.02                                     | 10                | < 0.2                         |
| <b>initial</b>    | Co      | < 0.02                                     | 10                | < 0.2                         |
| <b>final</b>      | Co      | 0.03                                       | 10                | 0.31                          |
| <b>initial</b>    | Ru      | < 0.02                                     | 10                | < 0.2                         |
| <b>final</b>      | Ru      | < 0.02                                     | 10                | < 0.2                         |
| <b>initial</b>    | P       | < 0.02                                     | 10                | < 0.2                         |
| <b>final</b>      | P       | 7.59                                       | 10                | 75.94                         |

**Table S2** Comparison of the electrocatalytic performances for HER in 1M KOH.

| Catalysts                                                                    | Electrolyte | Overpotential (mV) 10 mA cm <sup>-2</sup> | Tafel slope (mV dec <sup>-1</sup> ) | Reference                                           |
|------------------------------------------------------------------------------|-------------|-------------------------------------------|-------------------------------------|-----------------------------------------------------|
| CoFeO <sub>x</sub> H <sub>y</sub> -Ru/P-CoFe <sub>2</sub> O <sub>4</sub> /IF | 1 M KOH     | 22@20 mA cm <sup>-2</sup>                 | 43.2                                | This work                                           |
| RuO <sub>2</sub> @C                                                          | 1 M KOH     | 20                                        | 46                                  | <i>Nano Energy</i> 2019, 55, 49-58                  |
| RuCoP                                                                        | 1 M KOH     | 23                                        | 37                                  | <i>Energy Environ. Sci.</i> 2018, 11, 1819-1827     |
| Ru <sub>2</sub> -GC                                                          | 1 M KOH     | 25                                        | 65                                  | <i>ACS Catal.</i> 2018, 8, 11094-11102              |
| Ru@SC-CDs                                                                    | 1 M KOH     | 29                                        | 57                                  | <i>Nano Energy</i> 2019, 65, 104023                 |
| Ru@CN                                                                        | 1 M KOH     | 32                                        | 53                                  | <i>Energy Environ. Sci.</i> 2018, 11, 800-806       |
| Ru/CP                                                                        | 1 M KOH     | 35                                        | 50                                  | <i>Nanoscale</i> 2017, 9, 16616-16621               |
| Ru-MoS <sub>2</sub> /CNT                                                     | 1 M KOH     | 50                                        | 62                                  | <i>Adv. Sci.</i> 2019, 6, 1900090                   |
| Ru-ZIF-900                                                                   | 1 M KOH     | 51.6                                      | 78.4                                | <i>J. Mater. Chem. A</i> 2020, 8, 3203-3210         |
| RuP <sub>2</sub> @NPC                                                        | 1 M KOH     | 52                                        | 69                                  | <i>Angew. Chem., Int. Ed.</i> 2017, 56, 11559-11564 |
| Ru <sub>0.33</sub> Se @ TNA                                                  | 1 M KOH     | 57                                        | 50                                  | <i>Small</i> 2018, 14, 1802132                      |
| Cu <sub>2-x</sub> S@Ru                                                       | 1 M KOH     | 82                                        | 48                                  | <i>Small</i> 2017, 13, 1700052                      |

**Table S3** Comparison of the electrocatalytic performances for HER in alkaline medium.

| Catalysts                                                                    | Electrolyte | Overpotential (mV) at 100 mA cm <sup>-2</sup> | Reference                                    |
|------------------------------------------------------------------------------|-------------|-----------------------------------------------|----------------------------------------------|
| CoFeO <sub>x</sub> H <sub>y</sub> -Ru/P-CoFe <sub>2</sub> O <sub>4</sub> /IF | 1 M KOH     | 54.4                                          | This work                                    |
| RuO <sub>x</sub> -Ni(OH) <sub>2</sub> /NF                                    | 1 M KOH     | 61.7                                          | <i>Electrochimica Acta</i> 2020, 356, 136732 |
| RuP(S-RP/C)                                                                  | 1 M KOH     | 71                                            | <i>Adv. Mater.</i> 2018, 30, 1800047         |
| Ru-HPC                                                                       | 1 M KOH     | ~80                                           | <i>Nano Energy</i> 2019, 58, 1-10            |
| Pt                                                                           | 1 M KOH     | 87                                            | <i>Small Methods</i> , 2020, 4, 1900796      |

|                                                |           |      |                                                      |
|------------------------------------------------|-----------|------|------------------------------------------------------|
| Fe <sub>0.5</sub> Co <sub>0.5</sub> P          | 1 M KOH   | 98   | <i>Energy Environ. Sci.</i> , 2018,11, 2246-2252     |
| Ru NP/C                                        | 1 M KOH   | ~100 | <i>Adv. Energy Mater.</i> 2018, 8, 1801698           |
| Pt <sub>SA</sub> -Co(OH) <sub>2</sub> @Ag NWs  | 1 M KOH   | 104  | <i>Energy Environ. Sci.</i> , 2020,13, 3082-3092     |
| Ni-MoO <sub>2</sub> -400 NWs-CC                | 1 M KOH   | 105  | <i>J Mater Chem A</i> 2017, 5, 24453-24461           |
| Co P/CNT                                       | 1 M KOH   | 109  | <i>Nat. Commun.</i> 2016, 7, 10771                   |
| Pt <sub>SA</sub> -NT-NF                        | 1 M KOH   | 110  | <i>Angew. Chem. Int. Ed.</i> , 2017, 56, 13694-13698 |
| Pt/Ni(HCO <sub>3</sub> ) <sub>2</sub>          | 1 M KOH   | 120  | <i>Angew. Chem. Int. Ed.</i> 2019, 58, 5432          |
| Pt-Co(OH) <sub>2</sub> /CC                     | 1 M KOH   | 122  | <i>ACS Catal.</i> , 2017, 7, 7131-7135               |
| Pt SNs -MoO <sub>2</sub> NRs                   | 1 M KOH   | 135  | <i>Chem. Eng. J.</i> 2022, 427, 131309               |
| V-CoP/CC                                       | 1 M KOH   | 138  | <i>Chem. Sci.</i> 2018, 9, 1970                      |
| CoP/Ni <sub>5</sub> P <sub>4</sub> /CoP        | 1 M KOH   | 140  | <i>Energy Environ. Sci.</i> 2018, 11, 2246           |
| Ni-BDT                                         | 1 M KOH   | 150  | <i>Chem</i> 2017, 3, 122-133                         |
| Ni <sub>3</sub> N/Pt                           | 1 M KOH   | 170  | <i>Adv. Energy Mater.</i> 2017, 7, 1601390           |
| Ru-Fe <sub>3</sub> O <sub>4</sub> @FeNi-LDH-NF | 1 M KOH   | 212  | <i>Dalton Trans.</i> , 2021, 50, 13951-13960         |
| RuCo@NC                                        | 0.1 M KOH | 218  | <i>Nat. Commun.</i> 2017, 8, 14969                   |

**Table S4** Comparison of the electrocatalytic performances for HER in neutral.

| Catalysts                                                                    | Electrolyte | Overpotential (mV) at 10 mA cm <sup>-2</sup> | Reference                                   |
|------------------------------------------------------------------------------|-------------|----------------------------------------------|---------------------------------------------|
| CoFeO <sub>x</sub> H <sub>y</sub> -Ru/P-CoFe <sub>2</sub> O <sub>4</sub> /IF | 1 M PBS     | 30.1@ 50 mA cm <sup>-2</sup>                 | This work                                   |
| Rh <sub>2</sub> P                                                            | 1 M PBS     | 38                                           | <i>Adv. Energy Mater.</i> 2018, 8, 1703489  |
| Ru, Cr <sub>2</sub> O <sub>3</sub> /NG                                       | 1 M PBS     | 53                                           | <i>RSC Adv.</i> , 2021,11, 6107-6113        |
| RuP <sub>2</sub> @NPC                                                        | 1 M PBS     | 57                                           | <i>Angew. Chem. Int. Ed.</i> 2017, 56,11559 |
| CC@WO <sub>3</sub> /Ru-450                                                   | 1 M PBS     | 64                                           | <i>Chem. Eng. J.</i> 2022, 430, 132953      |

|                                                                   |           |     |                                               |
|-------------------------------------------------------------------|-----------|-----|-----------------------------------------------|
| Ru/OMSNNC                                                         | 1 M PBS   | 70  | <i>Adv. Mater.</i> 2021, 2006965              |
| Ru <sub>SA</sub> -N-Ti <sub>3</sub> C <sub>2</sub> T <sub>x</sub> | 1 M PBS   | 81  | <i>J. Mater. Chem. A</i> 2020, 8, 24710–24717 |
| Ru/MEOH/THF                                                       | 0.1 M PBS | 83  | <i>Chem. Commun.</i> , 2017, 53, 11713        |
| Rh <sub>2</sub> P/NPC                                             | 0.2 M PBS | 119 | <i>J. Mater. Chem. A</i> 2020, 8, 25768–25779 |

**Table S5.** Comparison of the electrocatalytic performances overall water splitting

| Catalysts                                                                    | Electrolyte | Cell Voltage (V) at 10 mA cm <sup>-2</sup> | Reference                                         |
|------------------------------------------------------------------------------|-------------|--------------------------------------------|---------------------------------------------------|
| CoFeO <sub>x</sub> H <sub>y</sub> -Ru/P-CoFe <sub>2</sub> O <sub>4</sub> /IF | 1 M KOH     | 1.49                                       | This work                                         |
| Rh SAC-CuO NAs/CF                                                            | 1 M KOH     | 1.51                                       | <i>Nano Lett.</i> 2020, 20, 5482-5489             |
| Ru-NiCoP/NF                                                                  | 1 M KOH     | 1.515                                      | <i>Appl. Catal. B: Environ.</i> 2020, 279         |
| Ru/NiFe LDH-F/NF                                                             | 1 M KOH     | 1.53                                       | <i>Nanoscale</i> 2020, 12, 9669-9679              |
| Pt-CoS <sub>2</sub> /CC                                                      | 1 M KOH     | 1.55                                       | <i>Appl. Catal. B: Environ.</i> 2019, 249, 91-97  |
| RuO <sub>2</sub> /N-C                                                        | 1 M KOH     | 1.55                                       | <i>J. Mater. Chem. A</i> 2018, 6, 1376-1381       |
| IrTe <sub>2</sub>                                                            | 1 M KOH     | 1.56                                       | <i>Adv. Funct. Mater.</i> 2020, 30, 2004375       |
| Ru <sub>1</sub> Ni <sub>1</sub> -NCNFs                                       | 1 M KOH     | 1.564                                      | <i>Adv. Sci.</i> 2020, 7, 1901833                 |
| Ru <sub>1</sub> Co <sub>2</sub> NPs                                          | 1 M KOH     | 1.59                                       | <i>ACS Appl. Energy Mater.</i> 2020, 3, 1869-1874 |
